# Supplementary material for: Comparative study of serum 6-hydroxy-5-methoxyindole-2-carboxylic acid, 5-S-cysteinyl-dopa, and lactate dehydrogenase levels as markers for malignant melanoma
Source: Research Square preprint supplement (doi:10.21203/rs.3.rs-4470628/v1), 2024-06-10
Supplement: Supplementary file 1 [file 933da902f568836b3a942e51.xlsx]

## Sheet: Table_1
	Table 1 Sensitivity of 6H5MI2C, 5-S-CD and LD for each stage
		stage 0	stage I	stage II	non-metastatic stage (stages 0 to II)		stage III	stage IV	metastatic stage (stages III to IV)
	6H5MI2C (cut-off: 0.80 ng/mL)	0.5	0.375	0.333	0.368		0.407	0.765	0.545
	6H5MI2C (cut-off: 0.90 ng/mL)	0	0.375	0.222	0.263		0.333	0.706	0.477
	6H5MI2C (cut-off: 1.00 ng/mL)	0	0.25	0.111	0.158		0.296	0.647	0.432
	5-S-CD	0.5	0.25	0.222	0.263		0.185	0.588	0.341
	LD	0	0.25	0	0.105		0.222	0.529	0.341
	Abbreviations: 6H5MI2C, 6-hydroxy-5-methoxyindole-2-carboxylic acid; 5-S-CD, 5-S-cysteinyl-dopa; LD, lactate dehydrogenase
